# Supplementary material for: Goal or Gold: Overlapping Reward Processes in Soccer Players upon Scoring and Winning Money
Source: PLoS One. 2015 Apr 15;10(4):e0122798. doi: 10.1371/journal.pone.0122798 (PMC4398371; doi:10.1371/journal.pone.0122798)
Supplement: S1 Table — (DOCX) [file pone.0122798.s003.docx]

**Table S1.** Physical, soccer, and video game attributes of 28 soccer players.

| **Attributes** | **n** | **Min.** | **Max.** | **Mean** | **SD** |
| --- | --- | --- | --- | --- | --- |
| Age (years) | 28 | 18 | 31 | 24.57 | 3.21 |
| Weight (kg) | 28 | 65 | 91 | 77.25 | 7.33 |
| Height (cm) | 28 | 172 | 194 | 181.82 | 6.19 |
| Soccer experience (years) | 28 | 3 | 25 | 17.43 | 4.91 |
| Training/week (h) | 28 | 4 | 12 | 6.57 | 2.13 |
| League* | 28 | 5 | 11 | 8.46 | 1.64 |
| Video game experience (years) | 20 | 4 | 19 | 10.70 | 4.47 |
| Video gaming/week (h) | 20 | 0 | 15 | 2.55 | 3.24 |

n = number of soccer players who answered the question

* = out of eleven possible leagues, where the 1st German league referred to the “1. Bundesliga”
(1st German National league) and the 11th German league referred to the “Kreisliga D” (District league D).
